# Supplementary material for: Unexpected formation of ansa isomers enabled by phosphazene ring flexibility in the reactions of cyclotetraphosphazene with 1,2-ethanediol
Source: Royal Society of Chemistry journal article supplement (doi:10.1039/d1dt00386k), 2021-01-01
Supplement: d1dt00386k1.pdf [file d1dt00386k1.pdf]

# **Unexpected formation of ansa isomers enabled by phosphazene ring flexibility in the reactions of cyclotetraphosphazene with 1,2-ethanediol**

*Duygu Palabıyık,<sup>a</sup> Ceylan Mutlu Balcı,<sup>a</sup> Christopher W. Allen<sup>b</sup> and Serap Beşli<sup>a\*</sup>*

<sup>a</sup> Department of Chemistry, Gebze Technical University, 41400 Gebze-Kocaeli, Turkey.

<sup>b</sup> Department of Chemistry, University of Vermont, Burlington, Vermont 05405-0125, USA

**Table S1** Selected bond lengths (Å), bond angles (°) and conformational parameters for compounds **4A** and **4B**.

|                                                                                   |                   |                                                                                    |            |
|-----------------------------------------------------------------------------------|-------------------|------------------------------------------------------------------------------------|------------|
| 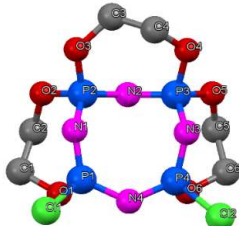 |                   |  |            |
| <b>4-A</b>                                                                        |                   | <b>4-B</b>                                                                         |            |
| <b>P1-N1</b>                                                                      | 1.562(3)          | <b>P5-N5</b>                                                                       | 1.566(3)   |
| <b>P2-N2</b>                                                                      | 1.576(3)          | <b>P6-N6</b>                                                                       | 1.571(3)   |
| <b>P3-N3</b>                                                                      | 1.585(3)          | <b>P7-N7</b>                                                                       | 1.583(3)   |
| <b>P4-N4</b>                                                                      | 1.560(3)          | <b>P8-N8</b>                                                                       | 1.562(3)   |
| <b>N1-P2</b>                                                                      | 1.586(3)          | <b>N5-P6</b>                                                                       | 1.584(3)   |
| <b>N2-P3</b>                                                                      | 1.581(3)          | <b>N6-P7</b>                                                                       | 1.579(3)   |
| <b>N3-P4</b>                                                                      | 1.569(3)          | <b>N7-P8</b>                                                                       | 1.562(3)   |
| <b>N4-P1</b>                                                                      | 1.564(3)          | <b>N8-P5</b>                                                                       | 1.562(3)   |
| <b>O---O (avg.)</b>                                                               | 3.204             | <b>O---O (avg.)</b>                                                                | 3.201      |
| <b>Cl-Cl</b>                                                                      | 5.231             | <b>Cl-Cl</b>                                                                       | 5.212      |
| <b>P1-N1-P2</b>                                                                   | 123.02(18)        | <b>P5-N5-P6</b>                                                                    | 123.16(17) |
| <b>P2-N2-P3</b>                                                                   | 124.20(17)        | <b>P6-N6-P7</b>                                                                    | 123.75(17) |
| <b>P3-N3-P4</b>                                                                   | 121.05(16)        | <b>P7-N7-P8</b>                                                                    | 120.86(17) |
| <b>P4-N4-P1</b>                                                                   | 129.29(19)        | <b>P8-N8-P5</b>                                                                    | 129.39(19) |
| <b>N1-P2-N2</b>                                                                   | 118.53(14)        | <b>N5-P6-N6</b>                                                                    | 116.93(14) |
| <b>N2-P3-N3</b>                                                                   | 116.76(14)        | <b>N6-P7-N7</b>                                                                    | 118.85(15) |
| <b>N3-P4-N4</b>                                                                   | 121.50(15)        | <b>N7-P8-N8</b>                                                                    | 120.27(15) |
| <b>N4-P1-N1</b>                                                                   | 122.15(16)        | <b>N8-P5-N5</b>                                                                    | 123.11(15) |
| <b>P1-N1-P2-N2</b>                                                                | -49.1(3)          | <b>P5-N5-P6-N6</b>                                                                 | 51.3(3)    |
| <b>P2-N2-P3-N3</b>                                                                | 56.1(2)           | <b>P6-N6-P7-N7</b>                                                                 | -58.4(2)   |
| <b>P3-N3-P4-N4</b>                                                                | -88.4(2)          | <b>P7-N7-P8-N8</b>                                                                 | 87.4(2)    |
| <b>P4-N4-P1-N1</b>                                                                | -28.9(4)          | <b>P8-N8-P5-N5</b>                                                                 | 27.6(4)    |
| <b>N1-P2-N2-P3</b>                                                                | -55.0(3)          | <b>N5-P6-N6-P7</b>                                                                 | 52.6(3)    |
| <b>N2-P3-N3-P4</b>                                                                | 48.4(2)           | <b>N6-P7-N7-P8</b>                                                                 | -45.8(2)   |
| <b>N3-P4-N4-P1</b>                                                                | 33.8(3)           | <b>N7-P8-N8-P5</b>                                                                 | -34.3(3)   |
| <b>N4-P1-N1-P2</b>                                                                | 80.8(3)           | <b>N8-P5-N5-P6</b>                                                                 | 159.02(17) |
| <b>Selected Conformational Parameters</b>                                         |                   |                                                                                    |            |
| <b>Puckering amplitude, Q, for eight membered ring</b>                            | 1.176(3)          | 1.180(3)                                                                           |            |
| <b>Max. Deviation (Å) phosphazene ring</b>                                        | -0.646(3)<br>(N2) | -0.633(3)<br>(N7)                                                                  |            |

**Table S2.** Table S2 Selected bond lengths (Å), bond angles (°) and conformational parameters for compounds **3** and **5**.

|                                                                                   |                  |                                                                                    |                       |
|-----------------------------------------------------------------------------------|------------------|------------------------------------------------------------------------------------|-----------------------|
| 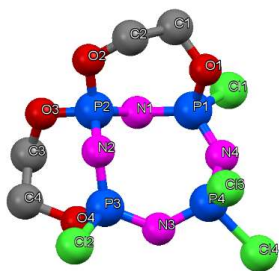 |                  |  |                       |
| <b>3</b>                                                                          |                  | <b>5</b>                                                                           |                       |
| <b>P1-N1</b>                                                                      | 1.548(17)        | <b>P1-N1</b>                                                                       | 1.571(3)              |
| <b>P2-N2</b>                                                                      | 1.570(18)        | <b>P1-N2</b>                                                                       | 1.570(5)              |
| <b>P3-N3</b>                                                                      | 1.566(19)        | <b>P2-N3</b>                                                                       | 1.569(3)              |
| <b>P4-N4</b>                                                                      | 1.58(2)          | <b>N1-P1</b>                                                                       | 1.571(3)              |
| <b>N1-P2</b>                                                                      | 1.612(17)        | <b>N2-P2</b>                                                                       | 1.577(4)              |
| <b>N2-P3</b>                                                                      | 1.597(17)        |                                                                                    |                       |
| <b>N3-P4</b>                                                                      | 1.53(2)          |                                                                                    |                       |
| <b>N4-P1</b>                                                                      | 1.537(19)        |                                                                                    |                       |
| <b>O---O (avg.)</b>                                                               | 3.142            | <b>O---O (avg.)</b>                                                                | 3.236                 |
| <b>Cl---Cl (avg.)</b>                                                             | 5.296            |                                                                                    |                       |
| <b>P1-N1-P2</b>                                                                   | 121.4(10)        | <b>P1-N1-P1</b>                                                                    | 121.7(3)              |
| <b>P2-N2-P3</b>                                                                   | 122.1(10)        | <b>P1-N2-P2</b>                                                                    | 120.2(3)              |
| <b>P3-N3-P4</b>                                                                   | 129.1(14)        | <b>P2-N3-P2</b>                                                                    | 120.9(3)              |
| <b>P4-N4-P1</b>                                                                   | 134.6(18)        | <b>N1-P1-N2</b>                                                                    | 118.9(2)              |
| <b>N1-P2-N2</b>                                                                   | 114.6(9)         | <b>N2-P2-N3</b>                                                                    | 119.7(2)              |
| <b>N2-P3-N3</b>                                                                   | 119.8(10)        |                                                                                    |                       |
| <b>N3-P4-N4</b>                                                                   | 123.0(11)        |                                                                                    |                       |
| <b>N4-P1-N1</b>                                                                   | 122.4(12)        | <b>P1-N1-P1-N2</b>                                                                 | -51.7(5)              |
| <b>P1-N1-P2-N2</b>                                                                | -55.7(16)        | <b>P1-N2-P2-N3</b>                                                                 | 50.8(4)               |
| <b>P2-N2-P3-N3</b>                                                                | 87.2(16)         | <b>N1-P1-N2-P2</b>                                                                 | -50.8(4)              |
| <b>P3-N3-P4-N4</b>                                                                | -56(2)           | <b>N2-P2-N3-P2</b>                                                                 | 51.1(5)               |
| <b>P4-N4-P1-N1</b>                                                                | -37(3)           |                                                                                    |                       |
| <b>N1-P2-N2-P3</b>                                                                | -50.2(15)        |                                                                                    |                       |
| <b>N3-P4-N4-P1</b>                                                                | 39(3)            |                                                                                    |                       |
| <b>N4-P1-N1-P2</b>                                                                | 82.6(17)         | <i>Symmetry code#</i>                                                              | <i>l-x,y,z</i>        |
| <b>Selected Conformational Parameters</b>                                         |                  |                                                                                    |                       |
| <b>Puckering amplitude, Q, for eight membered ring</b>                            | 1.07(2)          |                                                                                    | 1.474(5)              |
| <b>Max. Deviation (Å) phosphazene ring</b>                                        | -0.40(3)<br>(N3) |                                                                                    | -0.740(5)<br>(N2/N2A) |

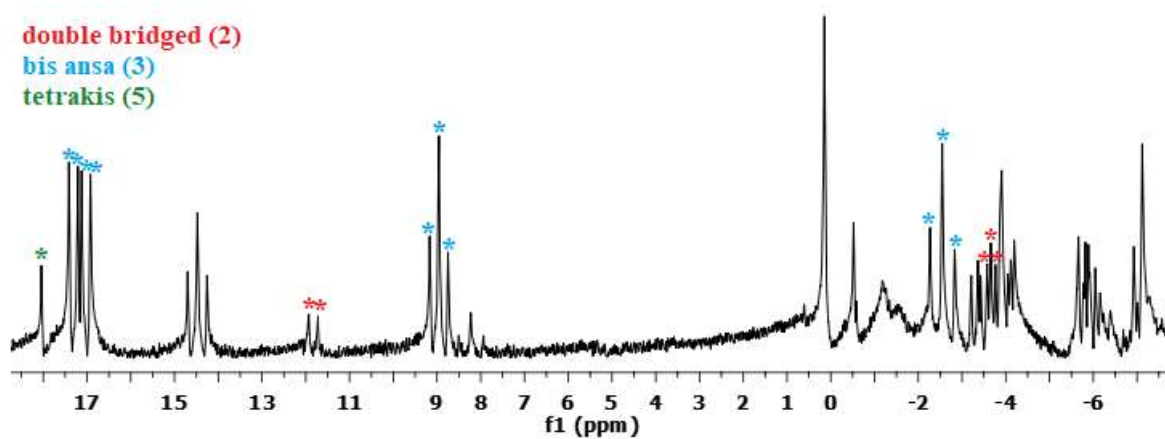

**Figure S1.** Proton-decoupled  $^{31}\text{P}$  NMR spectrum of the reaction mixture (1:6 ratio).

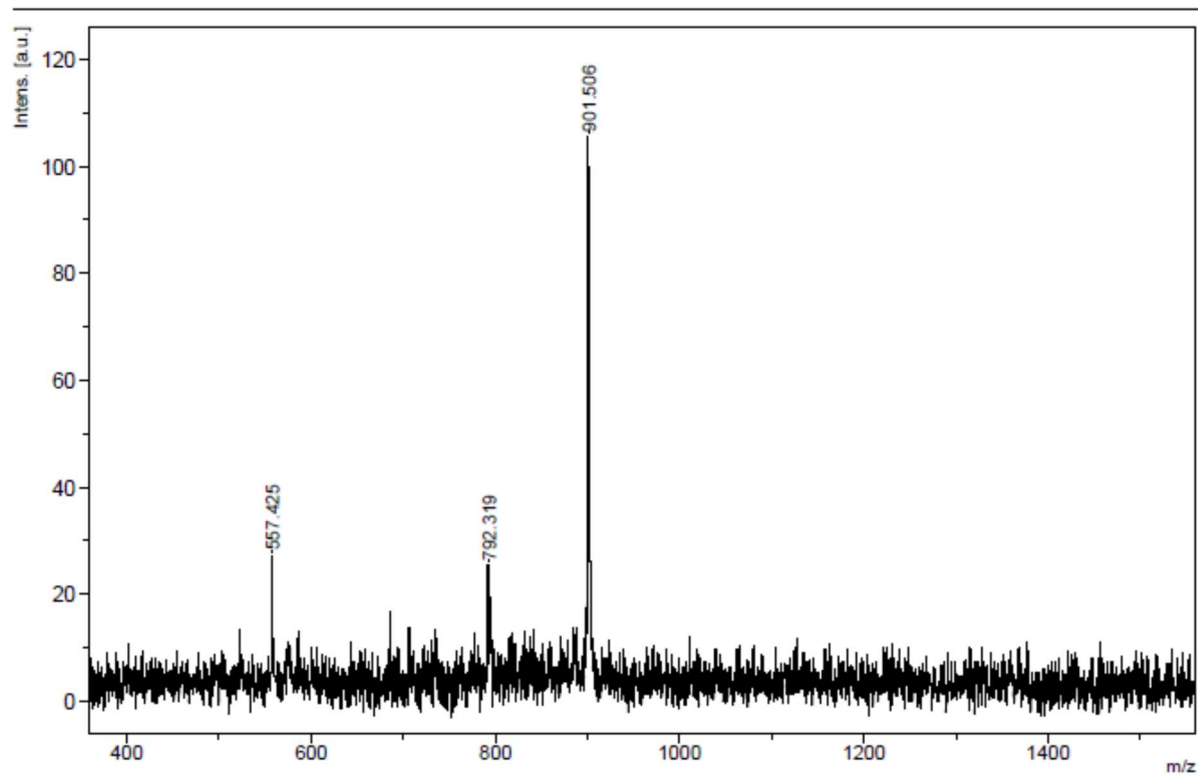

**Figure S2.** Mass spectrum of the compound 2.

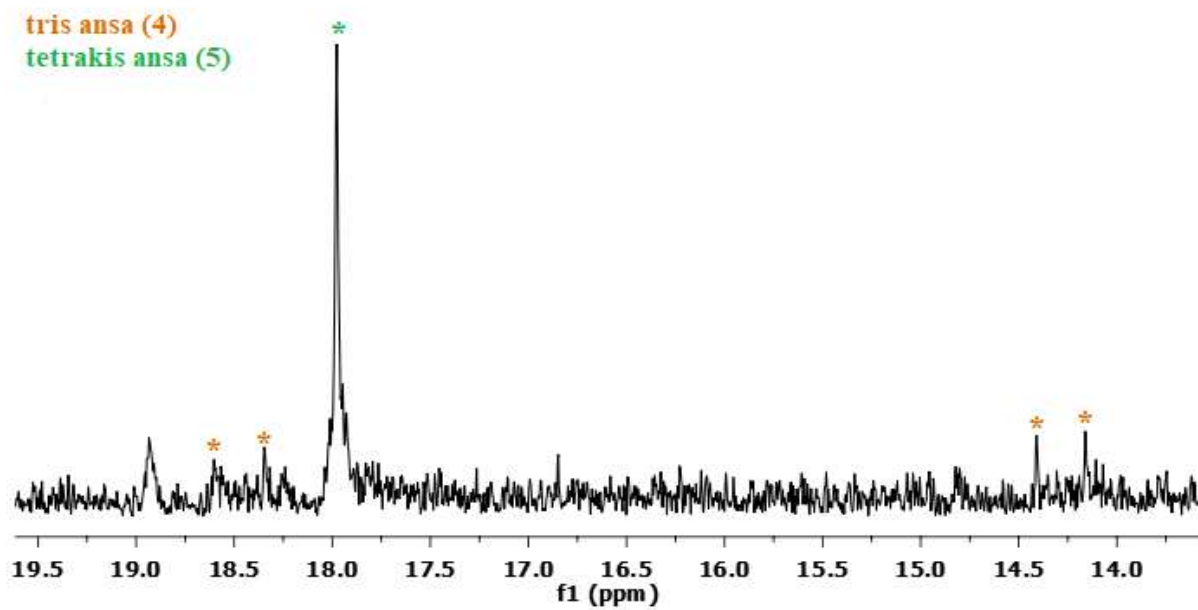

**Figure S3.** Proton-decoupled  $^{31}\text{P}$  NMR spectrum of the reaction mixture (1:10 ratio).

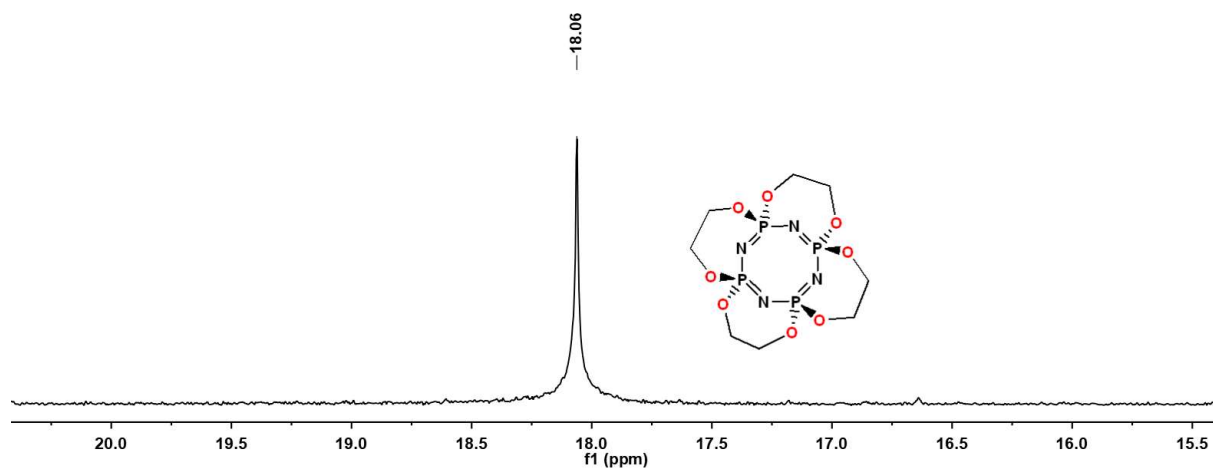

**Figure S4.** Proton-decoupled  $^{31}\text{P}$  NMR A<sub>4</sub> type spectrum of compound **5**.

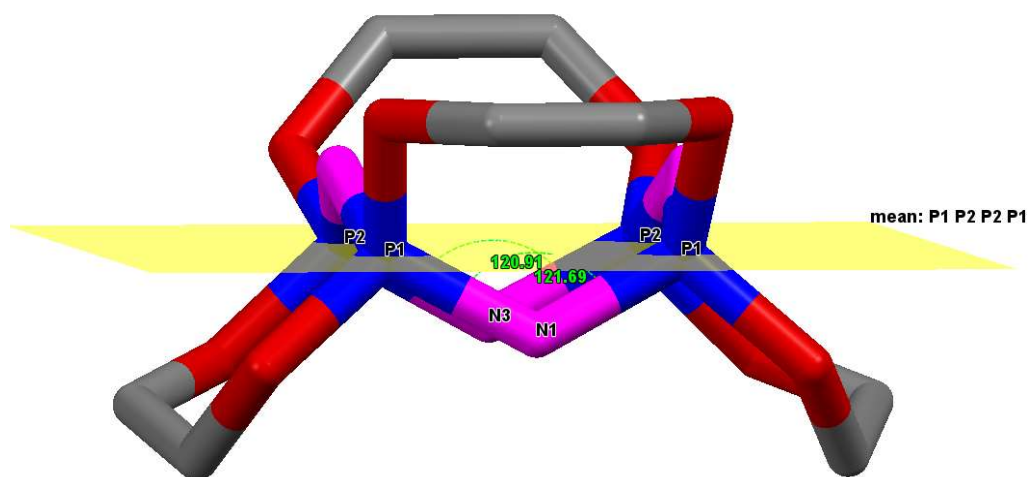

**Figure S5.** The arrangement of phosphorus atoms in the same plane and the representation of P-N-P angles in compound **5**.

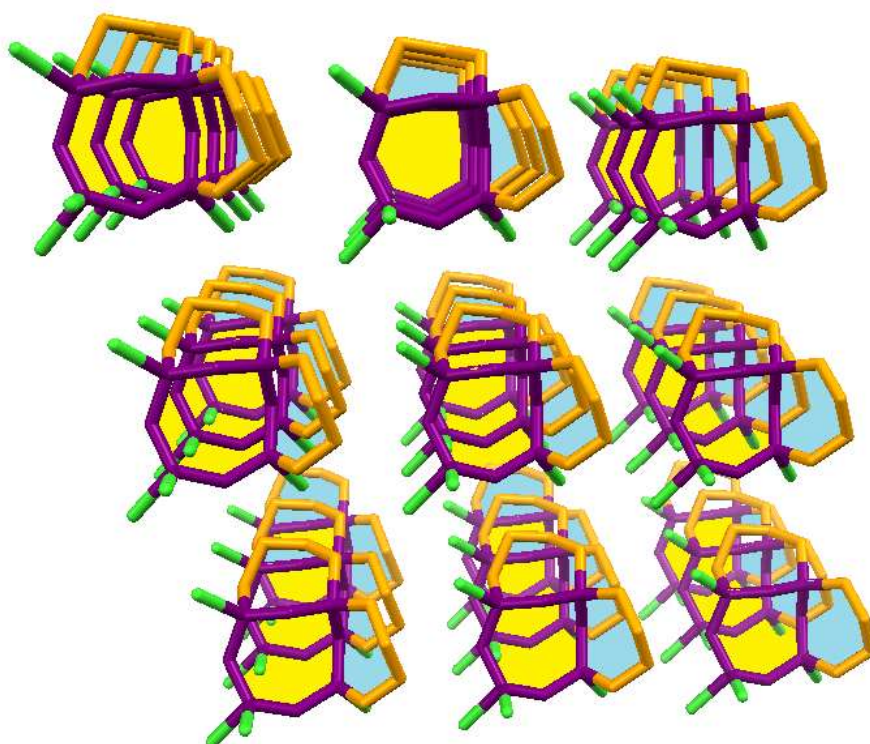

**Figure S6.** Perspective view in compound **3**; (PN)<sub>4</sub> ring was shown as purple color and ansa rings were depicted orange color. The space created by the (PN)<sub>4</sub> ring is marked in yellow, and the spaces created by the ansa rings are marked with turquoise.
